# Supplementary material for: Differential GAP requirement for Cdc42-GTP polarization during proliferation and sexual reproduction
Source: PubMed Central journal article supplement — J Cell Biol. 2018 Dec 3;217(12):4215–29. doi: 10.1083/jcb.201806016 (PMC6279383; doi:10.1083/jcb.201806016), 2018-12-03
Supplement: JCB_201806016_sm.pdf [file JCB_201806016_sm.pdf]

## Supplemental material

Gallo Castro and Martin, <https://doi.org/10.1083/jcb.201806016>

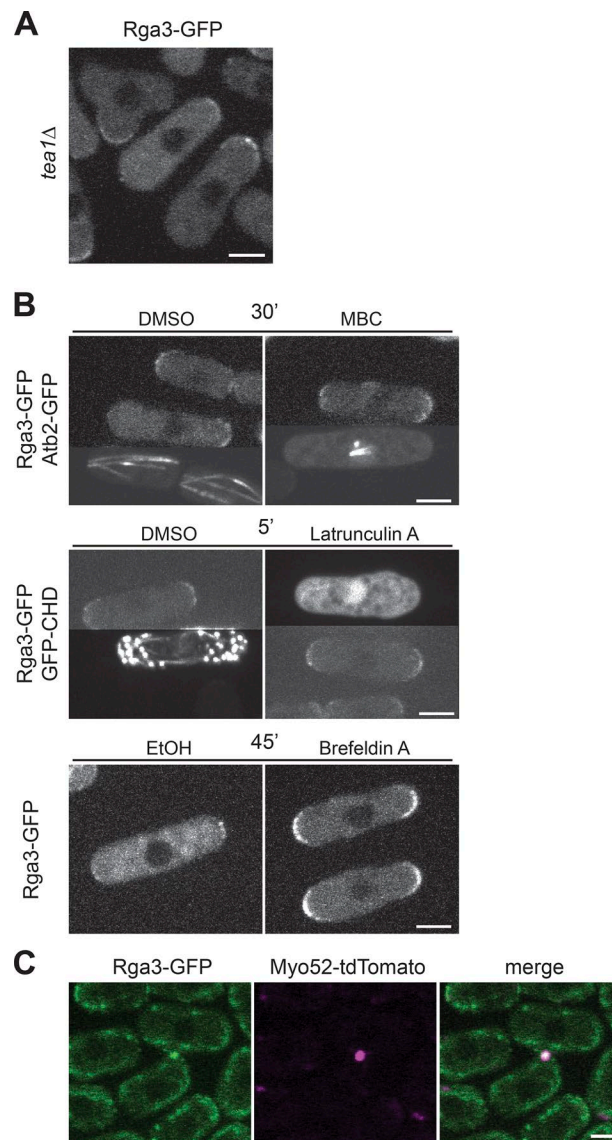

Figure S1. **Localization of Rga3 to sites of polarity independent of the cytoskeleton.** (A) Rga3-GFP at the single growing cell pole of *tea1Δ* cells. (B) Rga3-GFP in cells treated with MBC (top), latrunculin A (middle), or brefeldin A (bottom). Efficiency of MBC and latrunculin A was confirmed by coimaging cells carrying GFP-labeled Atb2 ( $\alpha$ -tubulin) or GFP-calponin homology domain (CHD), which labels F-actin, respectively. Images are contrasted differently for these markers. (C) Localization of Rga3-GFP (green) at the site of cell-cell fusion as labeled by the Myo52 fusion focus (purple). Bars, 3  $\mu$ m.

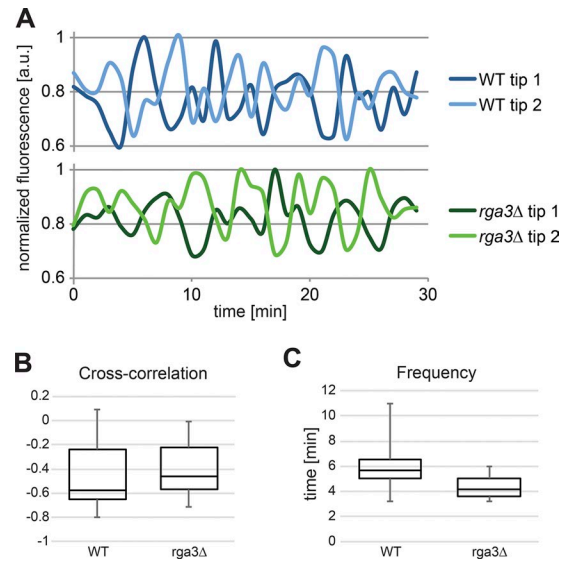

Figure S2. **Minor changes in Cdc42-GTP oscillations in *rga3Δ* cells.** **(A)** Relative fluorescence intensity of CRIB-GFP at the two cell poles of a single WT and *rga3Δ* cell over 30 min. **(B)** Values for cross-correlation between the fluorescence intensities at the two cell poles in cells as in A showing anticorrelation in both WT and *rga3Δ*. **(C)** Frequency of oscillation derived from traces as in A. The graphs show median values and upper and lower quartiles. Error bars indicate maximum and minimum values.  $n = 20$  cells.

Table S1. **Strains used in this study**

| Figure           | Strain  | Genotype                                                                                        |
|------------------|---------|-------------------------------------------------------------------------------------------------|
| Fig. 1 (A and B) | YSM3130 | h- wt ade6- leu1- ura4+                                                                         |
| Fig. 1 (A and B) | YSM3131 | h- rga3Δ::kanMX ade6- leu1-32 ura4-D18                                                          |
| Fig. 1 (A and B) | YSM1404 | h- rga4Δ::ura+ ade6- leu1-32 ura4-D18                                                           |
| Fig. 1 (A and B) | YSM3132 | h- rga6Δ::kanMX leu1- ura4+                                                                     |
| Fig. 1 (A and B) | YSM3133 | h- rga3Δ::kanMX rga4Δ::ura+ ade6- leu1-32 ura4-D18                                              |
| Fig. 1 (A and B) | YSM3134 | h- rga6Δ::kanMX rga4Δ::ura+ leu1-                                                               |
| Fig. 1 (A and B) | YSM3135 | h- rga3Δ::HPH rga6Δ::kan ade6- leu1- ura4                                                       |
| Fig. 1 (A and B) | YSM3136 | rga6Δ::kanMX rga3Δ::HPH rga4Δ::ura+ leu1-                                                       |
| Fig. 1 (A and B) | YSM3137 | h- ade6-M210 leu1-32 ura4-D18 + pSM1354                                                         |
| Fig. 2 (A and B) | YSM3138 | h+ cdc42-mCherry-SW-term-kanMX-3'UTR CRIB-GFP-ura4+ leu1-32                                     |
| Fig. 2 (A and B) | YSM3139 | h+ cdc42-mCherry-SW-term-kanMX-3'UTR CRIB-GFP-ura4+ rga6Δ::kanMX rga3Δ::HPH rga4Δ::ura+ leu1-32 |
| Fig. 2 B         | YSM3164 | h+ rga3Δ::HPH cdc42-mCherry-SW-term-kanMX-3'UTR CRIB:GFP3:ura4+ ade6- leu1-                     |
| Fig. 2 C         | YSM3140 | h- rga3Δ::hph rga4Δ::ura+ rga6Δ::kan scd2-mCherry-NAT                                           |
| Fig. 2 D         | YSM3141 | cdc42-mCherry-SW-term-kanMX-3'UTR ade6- leu1-32 ura4-D18                                        |
| Fig. 2 D         | YSM3142 | rga3Δ::HPH cdc42-mCherry-SW-kan ade6- leu1-32 ura4-D18                                          |
| Fig. 2 D         | YSM3143 | rga4Δ::ura+ cdc42-mCherry-SW-kan ade6- leu1-32 ura4-D18                                         |
| Fig. 2 D         | YSM3144 | rga6Δ::KAN cdc42-mCherry-SW-term-kanMX-3'UTR ade6- leu1-32 ura4-D18                             |
| Fig. 2 D         | YSM3145 | rga6Δ::kanMX rga3Δ::HPH rga4Δ::ura+ cdc42-mCherry-SW-term-kanMX-3'UTR                           |
| Fig. 3 A         | YSM1965 | rga4-RFP-kanMX rga3-GFP-kanMX ura4-D18                                                          |
| Fig. 3 B         | YSM3146 | h+ rga3-GFP-kanMX cdc42-mCherry-SW-term-kanMX-3'UTR                                             |
| Fig. 3 C         | YSM3147 | h+ rga3-GFP-kanMX + pSM1138 ade6-M216 leu1-32 ura4-D18                                          |
| Fig. 3 C         | YSM3148 | h+ rga3-GFP-kanMX + pSM1358 ade6-M216 leu1-32 ura4-D18                                          |
| Fig. 3 F         | YSM1232 | h+ rga3-GFP-kanMX ade6- leu1-32 ura4-D18                                                        |
| Fig. 3 F         | YSM3149 | h- rga3(-c1)-gfp-kanMX ade6- leu1- ura4+                                                        |
| Fig. 3 G         | YSM3150 | rga6Δ::kanMX rga4Δ::ura+ rga3-gfp-kanMX                                                         |
| Fig. 3 G         | YSM3151 | rga3(-c1)-gfp-kanMX rga6Δ::kanMX rga4Δ::ura+                                                    |
| Fig. 4 (A-C)     | YSM2042 | h- scd2-mCherry-natMX                                                                           |
| Fig. 4 (A-C)     | YSM3152 | h+ scd2-GFP-hphMX ade6+ leu1+ ura4-D18                                                          |
| Fig. 4 (A-C)     | YSM3153 | h+ rga3Δ::HPH scd2-GFP-hphMX ura4-D18                                                           |
| Fig. 4 (B and C) | YSM3249 | h+ rga3(-c1)-gfp-kanMX scd2-GFP-hphMX ura4+                                                     |
| Fig. 4 (B and C) | YSM3250 | h+ rga3(-c1)-gfp-kanMX scd2-GFP-hphMX ura4+                                                     |
| Fig. 4 (B and C) | YSM3251 | h+ rga3(ΔGAP)-natMX scd2-GFP-hphMX ade6+ leu1+ ura4-D18                                         |
| Fig. 4 (B and C) | YSM3252 | h+ rga3(ΔGAP)-natMX scd2-GFP-hphMX ade6+ leu1+ ura4-D18                                         |
| Fig. 4 D         | YSM3154 | h- sxa2Δ::kanMX scd2-GFP-hphMX ade6- leu1- ura4+                                                |
| Fig. 4 D         | YSM3155 | h- rga3Δ::kanMX sxa2Δ::kanMX scd2-GFP-hphMX ade6- leu1- ura4+                                   |
| Fig. 4 E         | YSM2042 | h- scd2-mCherry-natMX                                                                           |
| Fig. 4 E         | YSM2764 | h+ scd2-mCherry-natMX                                                                           |
| Fig. 4 E         | YSM3156 | h+ ura4-pfus1-dVenus-ura4+ ade6+ leu1+                                                          |
| Fig. 4 E         | YSM3157 | h+ rga3Δ::hphMX ura4-pfus1-dVenus-ura4+ ade6+ leu1+                                             |
| Fig. 4 F         | YSM3158 | h+ wt ade6- leu1- ura4+                                                                         |
| Fig. 4 F         | YSM3130 | h- wt ade6- leu1- ura4+                                                                         |
| Fig. 4 F         | YSM3159 | h+ rga3Δ::kanMX ade6- leu1-32 ura4-D18                                                          |
| Fig. 4 F         | YSM3131 | h- rga3Δ::kanMX ade6- leu1-32 ura4-D18                                                          |
| Fig. 4 (F and G) | YSM1396 | h90 ade6+ leu1+ ura4+                                                                           |
| Fig. 4 (F and G) | YSM1996 | h90 rga3Δ::kanMX ade6+ leu1+ ura4+                                                              |

Table S1. **Strains used in this study (Continued)**

| <b>Figure</b>    | <b>Strain</b> | <b>Genotype</b>                                                                               |
|------------------|---------------|-----------------------------------------------------------------------------------------------|
| Fig. 4 H         | YSM1232       | h+ rga3-GFP-kanMX ade6- leu1-32 ura4-D18                                                      |
| Fig. 4 H         | YSM3160       | h+ rga3Δ::HPH ade6- leu1- ura4-                                                               |
| Fig. 4 H         | YSM952        | h- myo52-tomato-natMX ade6-M216 leu1-32 ura4-D18 his7+                                        |
| Fig. 5 A         | YSM3161       | h- rga3-gfp-kanMX myo52-tomato-natMX ade6-M216 leu1-32 ura4-D18                               |
| Fig. 5 A         | YSM3162       | h+ rga3-gfp-kanMX myo52-tomato-natMX ade6-M216 leu1-32 ura4-D18                               |
| Fig. 5 (B and C) | YSM3154       | h- sxa2Δ::kanMX scd2-GFP-hphMX ade6- leu1- ura4+                                              |
| Fig. 5 (B and C) | YSM3155       | h- rga3Δ::kanMX sxa2Δ::kanMX scd2-GFP-hphMX ade6- leu1- ura4+                                 |
| Fig. 5 D         | YSM2042       | h- scd2-mCherry-natMX                                                                         |
| Fig. 5 D         | YSM3153       | h+ rga3Δ::HPH scd2-GFP-hphMX ura4-D18                                                         |
| Fig. 6 (A and B) | YSM1371       | h+ wt ade6+ leu1+ ura4+ his7+                                                                 |
| Fig. 6 A         | YSM2042       | h- scd2-mCherry-natMX ade6+ leu1+ ura4+                                                       |
| Fig. 6 (A and B) | YSM3140       | h- rga3Δ::hph rga4Δ::ura+ rga6Δ::kan scd2-mCherry-NAT                                         |
| Fig. 6 A         | YSM3163       | h- rga3Δ::hph rga4Δ::ura+ rga6Δ::kan scd2-mCherry-NAT                                         |
| Fig. 6 C         | YSM1372       | h- wt ade6+ leu1+ ura4+ his7+                                                                 |
| Fig. 6 C         | YSM3139       | h+ cdc42-mCherry-SW-term-kanMX-3'UTR CRIB-GFP-ura4+ rga6Δ::kanMX rga3Δ::HPH rga4Δ::ura+ leu1- |
| Fig. S1 A        | YSM1234       | h+ tea1::ura4+ rga3-GFP-kanMX ura4-D18                                                        |
| Fig. S1 B        | YSM1232       | h+ rga3-GFP-kanMX ade6- leu1-32 ura4-D18                                                      |
| Fig. S1 B        | YSM1960       | h+ SV40-GFP-Atb2-leu+ leu1- ura4-                                                             |
| Fig. S1 B        | YSM1273       | h- nmt41-GFP-CHD-leu1+ ade6-M216 leu1-32 ura4-D18                                             |
| Fig. S1 C        | YSM3161       | h- rga3-gfp-kanMX myo52-tomato-natMX ade6-M216 leu1-32 ura4-D18                               |
| Fig. S1 C        | YSM3162       | h+ rga3-gfp-kanMX myo52-tomato-natMX ade6-M216 leu1-32 ura4-D18                               |
| Fig. S2 (A-C)    | YSM3138       | h+ cdc42-mCherry-SW-term-kanMX-3'UTR CRIB-GFP-ura4+ leu1-32                                   |
| Fig. S2 (A-C)    | YSM3164       | h+ rga3Δ::HPH cdc42-mCherry-SW-term-kanMX-3'UTR CRIB:GFP3:ura4+ ade6- leu1-                   |

Table S2. **Plasmids used in this study**

| Plasmid number | Plasmid name                | Plasmid construction                                                                                                                                                                                                                                           | Source                 |
|----------------|-----------------------------|----------------------------------------------------------------------------------------------------------------------------------------------------------------------------------------------------------------------------------------------------------------|------------------------|
| pSM1358        | pREP41-cdc42-mCherrySW-Q61L |                                                                                                                                                                                                                                                                | Bendezú et al., 2015   |
| pSM1414        | pGEX-KG-shk1CRIB            |                                                                                                                                                                                                                                                                | Tatebe et al., 2008    |
| pSM1397        | pMAL-TEV-cdc42              | Amplification of cdc42 from genomic DNA with primers osm2335 (5'-AAGGAAAAAGCGGCCGCATGCCACCATTAAAGTGTGC-3')-osm2337 (5'-GCTCTAGATTACAGTACCAAACA CTTTGAC-3'), digestion with NotI-XbaI, and cloned into pSM819 (pMAL-TEV) digested with the same enzymes         | A gift from L. Merlini |
| pSM1429        | pGEX-4T-1-Rga3              | Rga3 amplified from pSM1337 (see below) with primers osm2321 (5'-CGGGATCCATG ATATTCGAAAAAGTATTCC-3')-osm2323 (5'-AAGGAAAAAGCGGCCGCCTACAGATT ATGAAGAATCTTATCC-3'), digested BamHI-NotI, and cloned into psM394 (pGEX-4T-1) digested with same enzymes.          | This study             |
| pSM880         | pGEX-4T-1-Rga4              |                                                                                                                                                                                                                                                                | Lab stock              |
| pSM1433        | pGEX-4T-1-Rga6              | Rga6 fragment amplified from gDNA with primers osm2327 (5'-GGAATTCATGACCTTA AATCCTTCGACTC-3')-osm2329 (5'-AAGGAAAAAGCGGCCGCCTTAAGATTTCTTCTGTG TGATCG-3'), digested EcoRI-NotI, and cloned into psM394 (pGEX-4T-1) digested with same enzymes.                  | This study             |
| pSM1546        | pGEX-4T-1-Rga3(R816G)       | Mutagenesis PCR on pSM1429 with osm2551 (5'-GAGGTTGAAGGTATTTATgGGATATCTG GCAGTGCTTCT-3')-osm2552 (AGAAGCACATGCCAGATATCCcATAAATACCTTCAACCTC-3')                                                                                                                 | This study             |
| pSM1545        | pGEX-4T-1-Rga4(R783G)       | Mutagenesis PCR on pSM880 with osm2553 (5'-GATTTGAAGGTCTGTATgGCAAAAT CAGGGGCAACTTCT-3')-osm2554 (5'-AGAAGTTGCCCTGATTGGcATACAGACCTTCAAA ATC-3')                                                                                                                 | This study             |
| pSM1547        | pGEX-4T-1-Rga6(R354G)       | Mutagenesis PCR on pSM1433 with osm2555 (5'-CATGTACCGGAATTTTCgGCATTA GTGGTTCTGTGCC-3')-osm2556 (5'-GGGACCAGAACCCTAATGcGAAAAATCCCGGTAC ATG-3')                                                                                                                  | This study             |
| pSM1138        | pREP41-Cdc42-mcherry        |                                                                                                                                                                                                                                                                | Bendezú et al., 2015   |
| pSM1358        | pREP41-cdc42-mCherrySW-Q61L |                                                                                                                                                                                                                                                                | Bendezú et al., 2015   |
| pSM1337        | pREP41-Rga3-GFP             | Amplification of Rga3 from genomic DNA with primers osm1827 (5'-GGAAGATCTATG ATATTCGAAAAAGTATT-3')-osm1829 (5'-CTGGGATCCAGATTATGAAGAATCTTATC-3'), digestion with BglII-BamHI, and cloned into pSM621 (pRep41-EGFPc) digested with the same enzymes             | This study             |
| pSM1338        | pREP41-Rga3(1-790aa)-GFP    | Amplification of Rga3 from genomic DNA with primers osm1827 (5'-GGAAGATCTATG ATATTCGAAAAAGTATT-3')-osm1830 (5'-CTGGGATCCCTTCAATTTTCAATTGATT-3'), digestion with BglII-BamHI, and cloned into pSM621 (pRep41-EGFPc) digested with the same enzymes              | This study             |
| pSM1339        | pREP41-Rga3(1-686aa)-GFP    | Amplification of Rga3 from genomic DNA with primers osm1827 (5'-GGAAGATCTATG ATATTCGAAAAAGTATT-3')-osm1831 (5'-CTGGGATCCAGGATCGGCAGACTTTGATT-3'), digestion with BglII-BamHI, and cloned into pSM621 (pRep41-EGFPc) digested with the same enzymes             | This study             |
| pSM1341        | pREP41-Rga3(1-450aa)-GFP    | Amplification of Rga3 from genomic DNA with primers osm1827 (5'-GGAAGATCTATG ATATTCGAAAAAGTATT-3')-osm1833 (5'-CTGGGATCCCTGATTGTGCTGGAGTTGAAGA-3'), digestion with BglII-BamHI, and cloned into pSM621 (pRep41-EGFPc) digested with the same enzymes           | This study             |
| pSM1408        | pREP41-Rga3(288-969)-GFP    | Amplification of Rga3 fragment from pSM1337 with primers osm2274 (5'-GGAAGA ICTATGTTTCACAAACAATCTTTACTCCT-3')-osm1829 (5'-CTGGGATCCAGATTATGAAG AATCTTATC-3'), digestion with BglII-BamHI, and cloned into pSM621 (pRep41-EGFPc) digested with the same enzymes | This study             |
| pSM1409        | pREP41-Rga3(288-686)-GFP    | Amplification of Rga3 fragment from pSM1337 with primers osm2274 (5'-GGAAGA ICTATGTTTCACAAACAATCTTTACTCCT-3')-osm1831 (5'-CTGGGATCCAGGATCGGCAGA CTTTGATT-3'), digestion with BglII-BamHI, and cloned into pSM621 (pRep41-EGFPc) digested with the same enzymes | This study             |

Table S2. **Plasmids used in this study (Continued)**

| Plasmid number | Plasmid name                                 | Plasmid construction                                                                                                                                                                                                                                                                            | Source     |
|----------------|----------------------------------------------|-------------------------------------------------------------------------------------------------------------------------------------------------------------------------------------------------------------------------------------------------------------------------------------------------|------------|
| pSM2200        | pREP41-Rga3(288-790)-GFP                     | Amplification of Rga3 fragment from pSM1337 with primers <u>osm5062</u> (5'-CATGGT ACCAGATCTATGTTTCACAAACAATCTTTACTCCTG-3')- <u>osm5063</u> (5'-CATACCCGGGGA TCCTTCAATTTCAATTGATTTTCTAACG-3'), digestion with BglII-BamHI, and cloned into pSM621 (pRep41-EGFPc) digested with the same enzymes | This study |
| pSM2198        | pREP41-(Rga3)C1 × 3-GFP                      | Rga3 C1 domain in three copies was ordered as a Gblock. It was subsequently cloned into pSM621 previously digested with XhoI by In-Fusion method                                                                                                                                                | This study |
| pSM2187        | pJK211-pUra4-Afel-pfus1-dVenus-terminatordh1 | pfus1-dVenus fragment obtained from pSM1328 (derived from S. Pelet's gift of pSP10; University of Lausanne, Lausanne, Switzerland) digested with KpnI-XhoI and cloned in pSM2185 (pJK211-pUra4-Afel-terminatordh) digested with the same enzymes                                                |            |

Restriction enzymes are underlined; point mutageneses are lowercase bold.

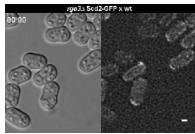

Video 1. **Exacerbated growth phenotypes of *rga3Δ* cells during mating.** Differential interference contrast and Scd2-GFP time-lapse images of  $h^+$  *rga3Δ scd2-GFP* cells mated to  $h^-$  WT. From the two *rga3Δ scd2-GFP* cells in the middle of the image, the top one extends a long shmoo and mates with a WT cell, while the bottom polarizes growth predominantly at the top cell pole but also intermittently at the bottom one without finding a partner cell. Time is in minutes. The video is shown at 10 frames/s. Bar, 3  $\mu$ m. See also Fig. 4 A.

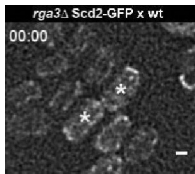

Video 2. **Example of *rga3Δ* cells with patch-wandering behavior.** Time-lapse images of Scd2-GFP in  $h^+$  *rga3Δ* cells mated with  $h^-$  WT. Two *rga3Δ scd2-GFP* cells, marked with asterisks in the first time point, form patches at cell poles that then move laterally toward the mating point with the partner cell. Time is in minutes. The video is shown at 10 frames/s. Bar, 3  $\mu$ m.

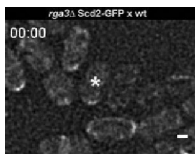

Video 3. **Example of *rga3Δ* cells with patch assembly–disassembly behavior.** Time-lapse images of Scd2-GFP in  $h^+$  *rga3Δ* cells mated with  $h^-$  WT. Example of an *rga3Δ scd2-GFP* cell (marked with asterisk in the first time point) that assembles and disassembles cortical patches before mating with a partner cell on the side. Time is in minutes. The video is shown at 10 frames/s. Bar, 3  $\mu$ m. See also Fig. 5 D, bottom cell.

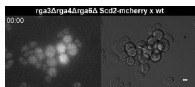

Video 4. **Cells lacking Rga3, Rga4, and Rga6 retain polarization ability during mating.** Time-lapse images of Scd2-mCherry in  $h^-$  *rga3Δrga4Δrga6Δ* cells mating with unlabeled  $h^+$  WT. See also Fig. 6 B. Time is in minutes. The video is shown at 10 frames/s. Bar, 3  $\mu$ m.
